# Supplementary material for: KLF3 promotes colorectal cancer growth by activating WNT1
Source: publisher site journal article supplement (doi:10.18632/aging.205494), 2024-02-01
Supplement: Supplementary file [file aging-v16i3-205494-supplementary-material-SD1.pdf]

**SUPPLEMENTARY FIGURE**

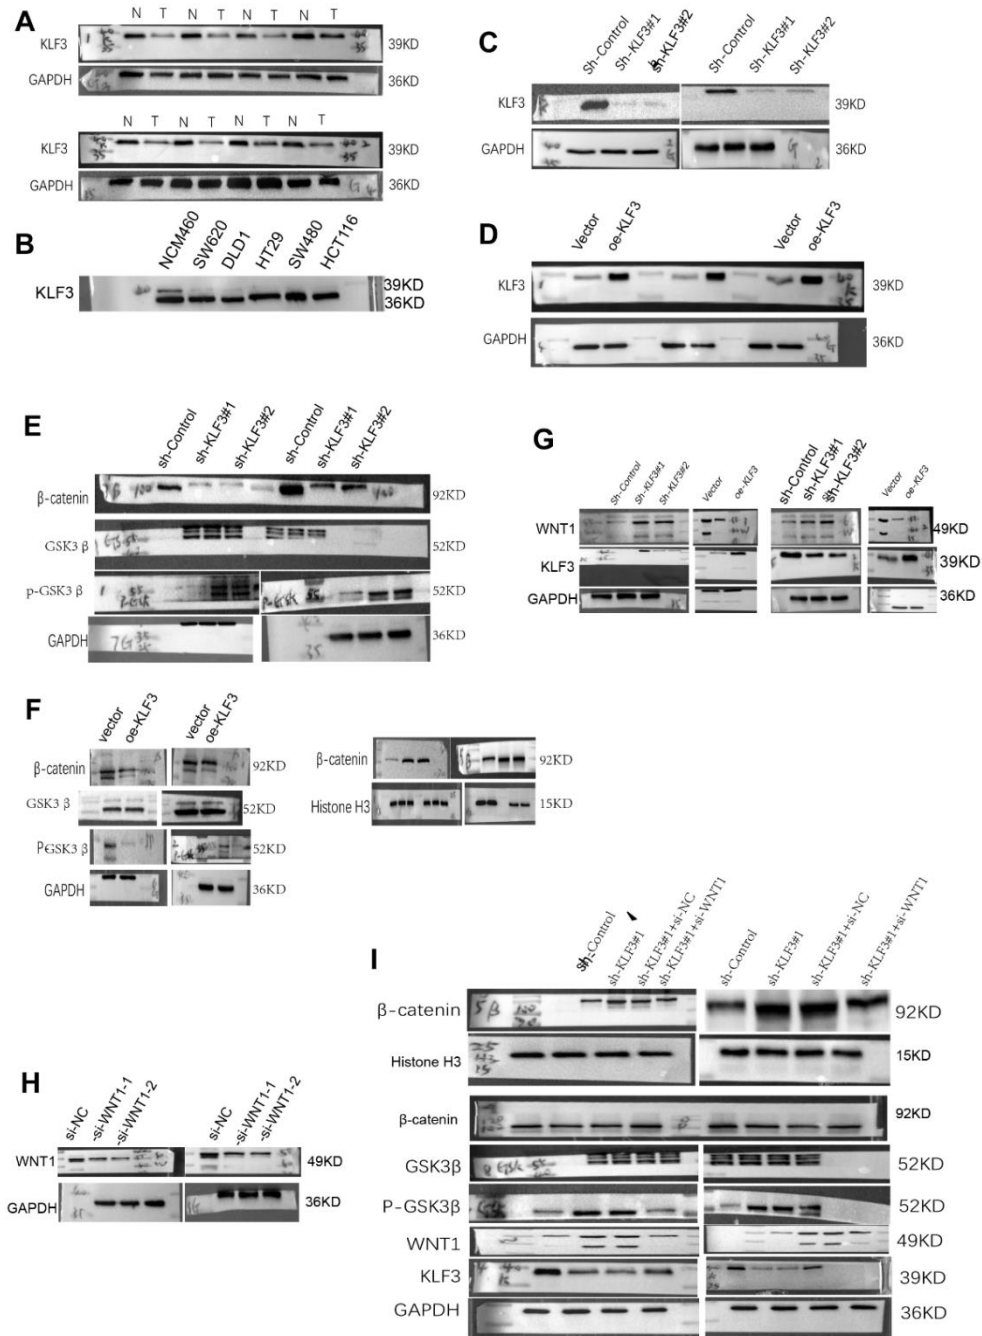

**Supplementary Figure 1. The full text refers to the original Western blot image. (A)** KLF3 protein levels measured by Western blotting in eight pairs of random CRC and normal samples. **(B)** KLF3 expression was higher in NCM460 than five CRC lines. **(C, D)** Western blot was used to evaluate the efficacy of knockdown and oe-KLF3 in HCT116 and SW480 CRC cells. **(E, F)** In oe-KLF3 and KLF3 knockout CRC cells, protein levels of markers associated with the WNT/ $\beta$ -catenin axis, including GSK3 $\beta$ , p-GSK3 $\beta$  (Ser9) and nuclear  $\beta$ -catenin, were altered. **(G)** Protein levels of WNT1 and KLF3 in HCT-116 and SW480 CRC cell lines after KLF3 knockdown and overexpression, respectively, as shown by Western blotting. **(H)** WNT1 protein levels in CRC cells after transfecting with si-WNT1 or si-NC. **(I)** Levels of markers associated with the WNT/ $\beta$ -catenin axis, including GSK3 $\beta$ , p-GSK3 $\beta$  (Ser9) and  $\beta$ -catenin, were reduced in KLF3 knockdown cells harbouring si-WNT1.
